# Supplementary material
Source: Springer Nature journal article supplement (https://www.springermedizin.de/resource/supplementary/12874_2012_917_MOESM3_ESM.pdf/9433150)
Supplement: MOESM3 [file 9433150]

Unique citations retrieved by search of  
electronic databases  
(n = 433)

Titles and abstracts excluded  
(n = 414)

Full papers checked  
(n = 19)

Excluded citations  
(n = 14)

No model = 5  
Not related to the workplace = 2  
Organisation level models = 1  
Limited individual-level models examining  
a single theme or a particular domain of a  
model or framework only = 6

Included studies  
(n = 5)
